# Supplementary material for: Maternal Risk Factors Associated with Neonatal Necrotizing Enterocolitis: a Meta-Analysis and Systematic Review
Source: Research Square preprint supplement (doi:10.21203/rs.3.rs-7348561/v1), 2025-08-19
Supplement: Supplementary file 1 [file 92d14f7703eceeefe493e06b.pdf]

| Author & Year                | Period                     | Location      | Hospital/Database                                                                                                                     | Inclusion Criteria                                                                                                                                                                                                                                                                                                                                                                                                                                                                                                                                                                                                           | Exclusion Criteria                                                                                                                                                                                                       | NEC Case Definition                                                                                                                                                   | n of Infants Included in Study | Incidence of NEC |
|------------------------------|----------------------------|---------------|---------------------------------------------------------------------------------------------------------------------------------------|------------------------------------------------------------------------------------------------------------------------------------------------------------------------------------------------------------------------------------------------------------------------------------------------------------------------------------------------------------------------------------------------------------------------------------------------------------------------------------------------------------------------------------------------------------------------------------------------------------------------------|--------------------------------------------------------------------------------------------------------------------------------------------------------------------------------------------------------------------------|-----------------------------------------------------------------------------------------------------------------------------------------------------------------------|--------------------------------|------------------|
| Atkinson et al., 1989        | 1983 - 1987                | United States | Children's Hospital of Oklahoma                                                                                                       | Newborns with documented NEC                                                                                                                                                                                                                                                                                                                                                                                                                                                                                                                                                                                                 | incomplete birth and prenatal histories, congenital heart disease, gastrointestinal anomalies, congenital syndromes, exchange transfusion, or umbilical artery catheterization                                           | standard clinical criteria for for GI dysfunction, radiological demonstration of pneumatosis intestinalis                                                             | 135                            | 0.33             |
| Ahle et al., 2018            | 1987 - 2009                | Sweden        | National Patient Register (NPR), the Swedish Medical Birth Register (MBR), and the National Cause of Death Register (NCD)             | All infants in database                                                                                                                                                                                                                                                                                                                                                                                                                                                                                                                                                                                                      | missing personal identification number                                                                                                                                                                                   | WHO ICD-9 or 10 code for NEC                                                                                                                                          | 4376                           | 0.16             |
| Bexelius et al., 2018        | 1987-2009                  | Sweden        | Swedish Patient Register                                                                                                              | Infants with a diagnosis of NEC (n=720) were matched for gestational age and year of birth with reference individuals without NEC (n=3656)                                                                                                                                                                                                                                                                                                                                                                                                                                                                                   | Infants not meeting inclusion criteria                                                                                                                                                                                   | ICD-9 or ICD-10                                                                                                                                                       | 4376                           | 0.16             |
| Thompson et al., 2011        | 1991 - 2007                | United States | Yale New Haven Children's Hospital                                                                                                    | Infants $\leq 36$ weeks of gestation                                                                                                                                                                                                                                                                                                                                                                                                                                                                                                                                                                                         | GI anomalies or rapidly worsening undiagnosed clinical condition                                                                                                                                                         | Bell's criteria for NEC $\geq$ stage 2                                                                                                                                | 145                            | 0.26             |
| Okogbule-Wonodi et al., 2011 | 1993 - 2003<br>2007 - 2009 | United States | NICUS at Parkland Memorial Hospital                                                                                                   | Infants $< 33$ weeks of gestation, $< 1501$ g, and admitted to the NICU                                                                                                                                                                                                                                                                                                                                                                                                                                                                                                                                                      | confirmed diagnosis of congenital brain/neural tube defects or congenital viral infections                                                                                                                               | Bell's criteria for NEC $\geq$ stage 2 and confirmed by radiographic or pathologic findings                                                                           | 368                            | 0.08             |
| Luig et al., 2005            | 1994 - 1999                | Australia     | NICUS in New South Wales (NSW) or the Australian Capital Territory (ACT)                                                              | 24-31 weeks and admitted to NICU                                                                                                                                                                                                                                                                                                                                                                                                                                                                                                                                                                                             | not clear                                                                                                                                                                                                                | radiologically or surgically proven NEC before death or discharge from hospital                                                                                       | 4649                           | 0.04             |
| Bertino et al., 2009         | 1994 - 2005                | Italy         | NICU at Turin University                                                                                                              | VLBW infants $> 23$ weeks of gestation and admitted to the NICU                                                                                                                                                                                                                                                                                                                                                                                                                                                                                                                                                              | moved to another unit within the first week of life or had severe congenital anomalies                                                                                                                                   | Bell's criteria for NEC $\geq$ stage 2                                                                                                                                | 34                             | 0.5              |
| Bashiri et al., 2003         | 1995 - 1998                | Israel        | Soroka University Medical Center                                                                                                      | VLBW infants $\leq 1500$ g                                                                                                                                                                                                                                                                                                                                                                                                                                                                                                                                                                                                   | not clear                                                                                                                                                                                                                | feeding intolerance, ileus, abdominal distention, vomiting, bloody stool, radiological demonstration of pneumatosis intestinalis and/ or surgical confirmation of NEC | 211                            | 0.08             |
| Salhab et al., 2004          | 1995 - 1998                | United States | Parkland Memorial Hospital                                                                                                            | ELBW infants $< 1000$ g                                                                                                                                                                                                                                                                                                                                                                                                                                                                                                                                                                                                      | congenital anomalies                                                                                                                                                                                                     | Bell's criteria for NEC $\geq$ stage 2                                                                                                                                | 68                             | 0.25             |
| Osmanağaoğlu et al., 2004    | 1995-2003                  | Turkey        | Department of Obstetrics and Gynecology, School of Medicine, Karadeniz Technical University                                           | This is a retrospective study that included 254 pregnant women with preterm rupture of membranes. The study group was divided according to the presence or absence of clinical chorio-amnionitis defined as the presence of two or more of the following criteria: maternal temperature $>38^{\circ}\text{C}$ on two or more occasions $\geq 1$ h apart, maternal tachycardia ( $\geq 120$ beats/min), uterine tenderness, foul smelling amni-otic fluid, maternal leukocytosis $\geq 20,000$ mm $^{-3}$ with bands and positive C reactive protein. Also the study population was divided according to the use of tocolysis | Exclusion criteria included multiple pregnancy, fetal congenital anomalies, diabetes mellitus and severe preeclampsia.                                                                                                   | characteristic clinical symptoms with radiographic findings of pneumatosis cystoides intestinalis (grade 2) or pneumoperitoneum or portal air (grade 3)               | 254                            | 0.19             |
| Goldenberg et al., 2006      | 1996-2001                  | United States | This was a retrospective analysis of data from an observational study of 457 consecutive 23- to 32-week liveborn singleton deliveries | All data and variables present                                                                                                                                                                                                                                                                                                                                                                                                                                                                                                                                                                                               | Occasionally, data for a specific variable from a specific patient were not available. In these cases, the data for that patient were excluded from both the numerator and denominator when percentages were determined. | Diagnosed clinically, used Bell's criteria for NEC $\geq$ stage 2                                                                                                     | 615                            | 0.31             |

| Author & Year           | Period      | Location      | Hospital/Database                                                                                                                   | Inclusion Criteria                                                                                                                                                                                                                                                                                                                                               | Exclusion Criteria                                                                                                                                                                                            | NEC Case Definition                                                                                                                                                                                                                  | n of Infants Included in Study | Incidence of NEC |
|-------------------------|-------------|---------------|-------------------------------------------------------------------------------------------------------------------------------------|------------------------------------------------------------------------------------------------------------------------------------------------------------------------------------------------------------------------------------------------------------------------------------------------------------------------------------------------------------------|---------------------------------------------------------------------------------------------------------------------------------------------------------------------------------------------------------------|--------------------------------------------------------------------------------------------------------------------------------------------------------------------------------------------------------------------------------------|--------------------------------|------------------|
| Son et al., 2016        | 1997-2004   | United States | Eunice Kennedy Shriver National Institute of Child Health and Human Development Maternal-Fetal Medicine Units Network.              | In the current analysis, we included all women from the clinical trial who delivered viable singleton gestations and had data available on mode of delivery and diagnosis of NEC. Eligible women were divided into 2 comparison groups based on their mode of delivery: those who underwent vaginal delivery and those who underwent CD.                         | Women with fetuses who were antenatally diagnosed with congenital anomalies were excluded from the study.                                                                                                     | Bell's criteria                                                                                                                                                                                                                      | 2012                           | 0.13             |
| Rose & Patel, 2018      | 2000-2016   | United States | PubMed search                                                                                                                       | To identify studies, we used the search term “necrotizing enterocolitis” or “necrotising enterocolitis” in PubMed with the search limited to systematic reviews. Additional randomized controlled trials (RCTs) and multicenter or regional/national observational studies specifically assessing risk factors for NEC were reviewed, including reference lists. | The presence of an indwelling umbilical arterial catheter has been an exclusion criterion for infants in feeding advancement studies, suggesting concern that these catheters may put infants at risk for NEC | Not clear                                                                                                                                                                                                                            | n/a                            | n/a              |
| Drenckpohl et al., 2010 | 2002 - 2008 | United States | NICU at Children’s Hospital of Illinois at OSF Saint Francis Medical Center                                                         | premature infants admitted to the NICU                                                                                                                                                                                                                                                                                                                           | not clear                                                                                                                                                                                                     | Vermont Oxford Network (VON) definition of presence of radiograph showing hepatobiliary air or pneumoperitoneum in context of abdominal distension, pneumatosis intestinalis, bilious gastric aspirates, emesis, and/or bloody stool | 324                            | 0.24             |
| Husseini et al., 2010   | 2002 - 2008 | France        | Monocentric NICU                                                                                                                    | All live births in the database                                                                                                                                                                                                                                                                                                                                  | not clear                                                                                                                                                                                                     | Bell's criteria for NEC $\geq$ stage 2                                                                                                                                                                                               | 147                            | 0.33             |
| Duci et al., 2019       | 2002 - 2016 | Italy         | Database of a Single Center                                                                                                         | All infants in database                                                                                                                                                                                                                                                                                                                                          | cardiovascular diseases                                                                                                                                                                                       | Bell's criteria for NEC $\geq$ stage 1                                                                                                                                                                                               | 270                            | 0.5              |
| Venkatesh et al., 2019  | 2002-2008   | United States | The CSL included infants born at $\geq 23$ weeks gestation between 2002 and 2008 encompassing 12 clinical centers with 19 hospitals | We initially defined women with chorioamnionitis using ICD-9-CM and chart abstraction data as outlined above.                                                                                                                                                                                                                                                    | We excluded births due to either unknown antibiotic exposure or duration                                                                                                                                      | ICD-9 codes                                                                                                                                                                                                                          | 211641                         | 0.002            |
| Yee et al., 2012        | 2003 - 2008 | Canada        | 25 NICUS in the Canadian Neonatal Network                                                                                           | Gestational age < 33 weeks and admitted to NICU                                                                                                                                                                                                                                                                                                                  | not clear                                                                                                                                                                                                     | Bell's criteria for NEC $\geq$ stage 2                                                                                                                                                                                               | 16669                          | 0.05             |
| Lee et al., 2017        | 2003 - 2014 | South Korea   | Seoul National University Bundang Hospital                                                                                          | All live and singleton births between 23 and 31 weeks gestation, admitted to the NICU, survived the first 15 days of birth, whose placentas went through histopathological examination, whose mothers had white blood cell counts taken, and the umbilical cord artery acid-base status was measured right after the infant was delivered                        | major congenital anomalies, twin or higher-order births, outborn infants, and isolated spontaneous intestinal perforation                                                                                     | Bell's criteria for NEC $\geq$ stage 2                                                                                                                                                                                               | 354                            | 0.07             |
| Isiyama et al., 2015    | 2003-2011   | Canada        | Canadian Neonatal Network centers                                                                                                   | preterm infants born at < 33 weeks gestational age admitted to neonatal intensive care units (NICUs) in the Canadian Neonatal Network (CNN)                                                                                                                                                                                                                      | We excluded infants with major congenital anomalies and those who were moribund (where a decision was made at birth not to provide resuscitative care) from the analysis or infants with missing data         | Bell's criteria                                                                                                                                                                                                                      | 29051                          | 0.05             |
| Downard et al., 2012    | 2004 - 2009 | United States | Database of Single Institution NICU                                                                                                 | All live births in the database admitted to the NICU                                                                                                                                                                                                                                                                                                             | not clear                                                                                                                                                                                                     | classified in database as having NEC and clinical or radiographic signs of NEC confirmed                                                                                                                                             | 219                            | 0.33             |

| Author & Year          | Period      | Location       | Hospital/Database                                                                                                                                                                                                                                                                                                                          | Inclusion Criteria                                                                                                                                              | Exclusion Criteria                                                                                                                                                            | NEC Case Definition                                                                                                                                                                                                                                                                                         | n of Infants Included in Study | Incidence of NEC |
|------------------------|-------------|----------------|--------------------------------------------------------------------------------------------------------------------------------------------------------------------------------------------------------------------------------------------------------------------------------------------------------------------------------------------|-----------------------------------------------------------------------------------------------------------------------------------------------------------------|-------------------------------------------------------------------------------------------------------------------------------------------------------------------------------|-------------------------------------------------------------------------------------------------------------------------------------------------------------------------------------------------------------------------------------------------------------------------------------------------------------|--------------------------------|------------------|
| Henderson et al., 2007 | 2004-2005   | United Kingdom | Royal Jubilee Maternity, Belfast; Princess Royal Maternity Hospital, Glasgow; Queen Mother's Hospital, Glasgow; Ninewells Hospital, Dundee; Royal Infirmary, Edinburgh; Forth Park Hospital, Kirkcaldy; Antrim Hospital, Antrim; Ayrshire Central Hospital, Irvine; Royal Victoria Infirmary, Newcastle; Royal Alexandra Hospital, Paisley | Cases were preterm infants (<37 completed weeks' gestation) with NEC diagnosed using modified Bell criteria or at laparotomy or autopsy examination             | anything outside of inclusion criteria                                                                                                                                        | Bell's criteria                                                                                                                                                                                                                                                                                             | 124                            | 0.43             |
| Boo & Cheah, 2012      | 2007 - 2007 | Malaysia       | NICUS registered in the Malaysian National Neonatal Registry                                                                                                                                                                                                                                                                               | VLBW infants, classified as 10th percentile or lower birth weight for gestational age                                                                           | infants < 501g                                                                                                                                                                | Bell's criteria for NEC $\geq$ stage 2                                                                                                                                                                                                                                                                      | 3601                           | 0.06             |
| March et al., 2014     | 2008 - 2012 | United States  | Beth Israel Deaconess Medical Center                                                                                                                                                                                                                                                                                                       | All live births in the database                                                                                                                                 | suspected cases but not confirmed                                                                                                                                             | ICD-9 code containing NEC, Vermont Oxford Network (VON) definition of presence of radiograph showing hepatobiliary air or pneumoperitoneum in context of abdominal distension, pneumatosis intestinalis, bilious gastric aspirates, emesis, and/or bloody stool, reviewers had to agree on diagnosis of NEC | 109                            | 0.26             |
| Ding et al., 2024      | 2008 - 2022 | China          | Department of Neonatology at Children's Hospital of Chongqing Medical University (CHCMU)                                                                                                                                                                                                                                                   | Small for gestational age (SGA) infants admitted to the department of neonatology                                                                               | incomplete medical information, discharged from hospital within 24 hours of hospitalization                                                                                   | Bell's criteria for NEC $\geq$ stage 2                                                                                                                                                                                                                                                                      | 286                            | 0.5              |
| Goldstein et al., 2020 | 2008 - 2027 | United States  | California Perinatal Quality Care Collaborative (CPQCC)                                                                                                                                                                                                                                                                                    | All infants in database                                                                                                                                         | outborn infants, congenital anomalies, missing outcome, missing race/ethnicity data                                                                                           | Vermont Oxford Network (VON) definition of presence of radiograph showing hepatobiliary air or pneumoperitoneum in context of abdominal distension, pneumatosis intestinalis, bilious gastric aspirates, emesis, and/or bloody stool                                                                        | 23011                          | 0.03             |
| Perger et al., 2015    | 2008-2011   | United States  | Scott & White tertiary regional                                                                                                                                                                                                                                                                                                            | Inclusion dates were selected due to availability of an integrated neonatal intensive care unit and hospital electronic medical record system starting in 2008. | Exclusion criteria included early non-viability of extremely low gestational age newborns that were not stillborn (n/444) and inaccessible infant medical records (n 1/4 41). | ICD-9 codes 777.5–777.53. All charts of NEC patients were manually reviewed                                                                                                                                                                                                                                 | 9993                           | 0.02             |
| Kovo et al., 2020      | 2008-2019   | Israel         | Edith Wolfson Medical Center                                                                                                                                                                                                                                                                                                               | We included only patients that their placentas were sent to histopathological evaluation, according to our departmental protocol.                               | Excluded pregnancies complicated by neonatal chromosomal or structural anomalies, and known intrauterine viral infection, as well as cases of stillbirths.                    | from neonatal records, unclear                                                                                                                                                                                                                                                                              | 344                            | 0.009            |
| Hua et al., 2014       | 2009 - 2012 | United States  | Thomas Jefferson University                                                                                                                                                                                                                                                                                                                | All live births in the database                                                                                                                                 | not clear                                                                                                                                                                     | Identified from existing NICU database                                                                                                                                                                                                                                                                      | 52                             | 0.5              |

| Author & Year          | Period      | Location       | Hospital/Database                                                                                 | Inclusion Criteria                                                                                                                                                                                                                                                                                                                                                                                                                                                                                                                            | Exclusion Criteria                                                                                                                                                                                                                                           | NEC Case Definition                                                                                                                                                                                   | n of Infants Included in Study | Incidence of NEC |
|------------------------|-------------|----------------|---------------------------------------------------------------------------------------------------|-----------------------------------------------------------------------------------------------------------------------------------------------------------------------------------------------------------------------------------------------------------------------------------------------------------------------------------------------------------------------------------------------------------------------------------------------------------------------------------------------------------------------------------------------|--------------------------------------------------------------------------------------------------------------------------------------------------------------------------------------------------------------------------------------------------------------|-------------------------------------------------------------------------------------------------------------------------------------------------------------------------------------------------------|--------------------------------|------------------|
| Gitau et al., 2023     | 2009 - 2019 | Kenya          | Aga Khan university Hospital Nairobi (AKUHN)                                                      | VLBW infants < 1500g and ≤ 32 weeks gestation                                                                                                                                                                                                                                                                                                                                                                                                                                                                                                 | missing charts or more than 10% of information for variables of interest, died within 72 hours of NICU admission, major congenital malformations, outborn, focal intestinal perforation or spontaneous intestinal perforation                                | Bell's criteria for NEC ≥ stage 2                                                                                                                                                                     | 200                            | 0.08             |
| Lu et al., 2016        | 2010-2015   | China          | The Chongqing Children's Hospital                                                                 | All infants in database                                                                                                                                                                                                                                                                                                                                                                                                                                                                                                                       | any immunodeficiency disease, inherited metabolic disorder, gastrointestinal malformation,                                                                                                                                                                   | ICD-9 and 10 codes, then proven Bell's criteria for NEC ≥ stage 2                                                                                                                                     | 585                            | 0.33             |
| Cetinkaya et al., 2017 | 2012 - 2013 | Turkey         | NICU at Kanuni Sultan Suleyman Training and Research Hospital                                     | Infants ≤ 36 weeks gestation and admitted to NICU                                                                                                                                                                                                                                                                                                                                                                                                                                                                                             | refusal of parental consent, major congenital malformation, chromosomal anomalies, stage I NEC and/or spontaneous intestinal perforation                                                                                                                     | classified according to Bell's criteria                                                                                                                                                               | 145                            | 0.18             |
| Cho et al., 2022       | 2013 - 2014 | South Korea    | NICUS in the Korean Neonatal Network (KNN)                                                        | VLBW infants                                                                                                                                                                                                                                                                                                                                                                                                                                                                                                                                  | not clear                                                                                                                                                                                                                                                    | Bell's criteria for NEC ≥ stage 2                                                                                                                                                                     | 10353                          | 0.07             |
| Kim et al., 2024       | 2013 - 2020 | South Korea    | NICUS in the Korean Neonatal Network (KNN)                                                        | VLBW infants admitted to NICU                                                                                                                                                                                                                                                                                                                                                                                                                                                                                                                 | severe congenital anomalies, no data of NEC, died within seven days of gestation                                                                                                                                                                             | Bell's criteria for NEC ≥ stage 2                                                                                                                                                                     | 5310                           | 0.14             |
| Irles et al., 2018     | 2015-2017   | Mexico         | NICU of a tertiary care hospital                                                                  | NEC patients included those presenting bedside KUB radiographic findings described in stages IIA, IIB, and IIIA as follows: Ileus with dilated bowel loops and focal pneumatosis, or widespread pneumatosis, or portal venous gas with or without ascites, without free air. Patients with intestinal perforation related to NEC included those presenting radiographic findings described in stage IIIB as follows: Pneumoperitoneum.                                                                                                        | incomplete clinical information as well as spontaneous or not associated with NEC intestinal perforation, as well as digestive tract malformations                                                                                                           | Bell's criteria                                                                                                                                                                                       | 27                             | 0.85             |
| Vallant et al., 2022   | 2015-2021   | United Kingdom | BadgerNet, Clevermed                                                                              | Babies born both in our institution or in referring units, and subsequently transferred to our institution, were included. Those who underwent surgery were only included as cases where NEC was confirmed histologically in a resection specimen. Controls were babies born <24 weeks gestational age, who throughout their admission did not receive a diagnosis of NEC. Matching of cases and controls was not undertaken due to the likely small number of babies included and the risk of matching for a potentially significant factor. | Babies who died within 24 hours of birth and babies who underwent a laparotomy for suspected NEC but were found to have an alternative diagnosis were excluded.                                                                                              | those with a documented diagnosis of NEC on their clinical record and treated as such with either a minimum of 5days of intravenous antibiotics in combination with gut rest or surgical intervention | 56                             | 0.55             |
| Li et al., 2024        | 2019 - 2021 | China          | Neonatology Department of the Suzhou Municipal Hospital and Suzhou University Children's Hospital | infants < 32 weeks or birth weight < 1500 g                                                                                                                                                                                                                                                                                                                                                                                                                                                                                                   | genetic metabolic disorders, chromosomal disorders and severe congenital malformations                                                                                                                                                                       | Bell's criteria for NEC ≥ stage 2                                                                                                                                                                     | 234                            | 0.23             |
| Abebe et al., 2024     | 2023 - 2023 | Ethiopia       | NICUS in public hospitals of Hawasa and Dilla town                                                | infants admitted to NICU                                                                                                                                                                                                                                                                                                                                                                                                                                                                                                                      | recovered from NEC but had other health issues, those with additional neonatal diseases, and those with major congenital anomalies, genetic disorders, absent or non-communicative mothers, or incomplete records were excluded from both cases and controls | physician diagnosis from modified Bell's criteria                                                                                                                                                     | 443                            | 0.25             |
| Hallstrom et al., 2003 | not clear   | Finland        | Tampere University Hospital                                                                       | Infants < 33 weeks of gestation                                                                                                                                                                                                                                                                                                                                                                                                                                                                                                               | not clear                                                                                                                                                                                                                                                    | classified according to Bell's criteria                                                                                                                                                               | 152                            | 0.25             |
